# Supplementary material for: Itaconate stabilizes CPT1a to enhance lipid utilization during inflammation
Source: eLife journal article supplement (doi:10.7554/elife.92420), 2023-11-30

Figure 3a

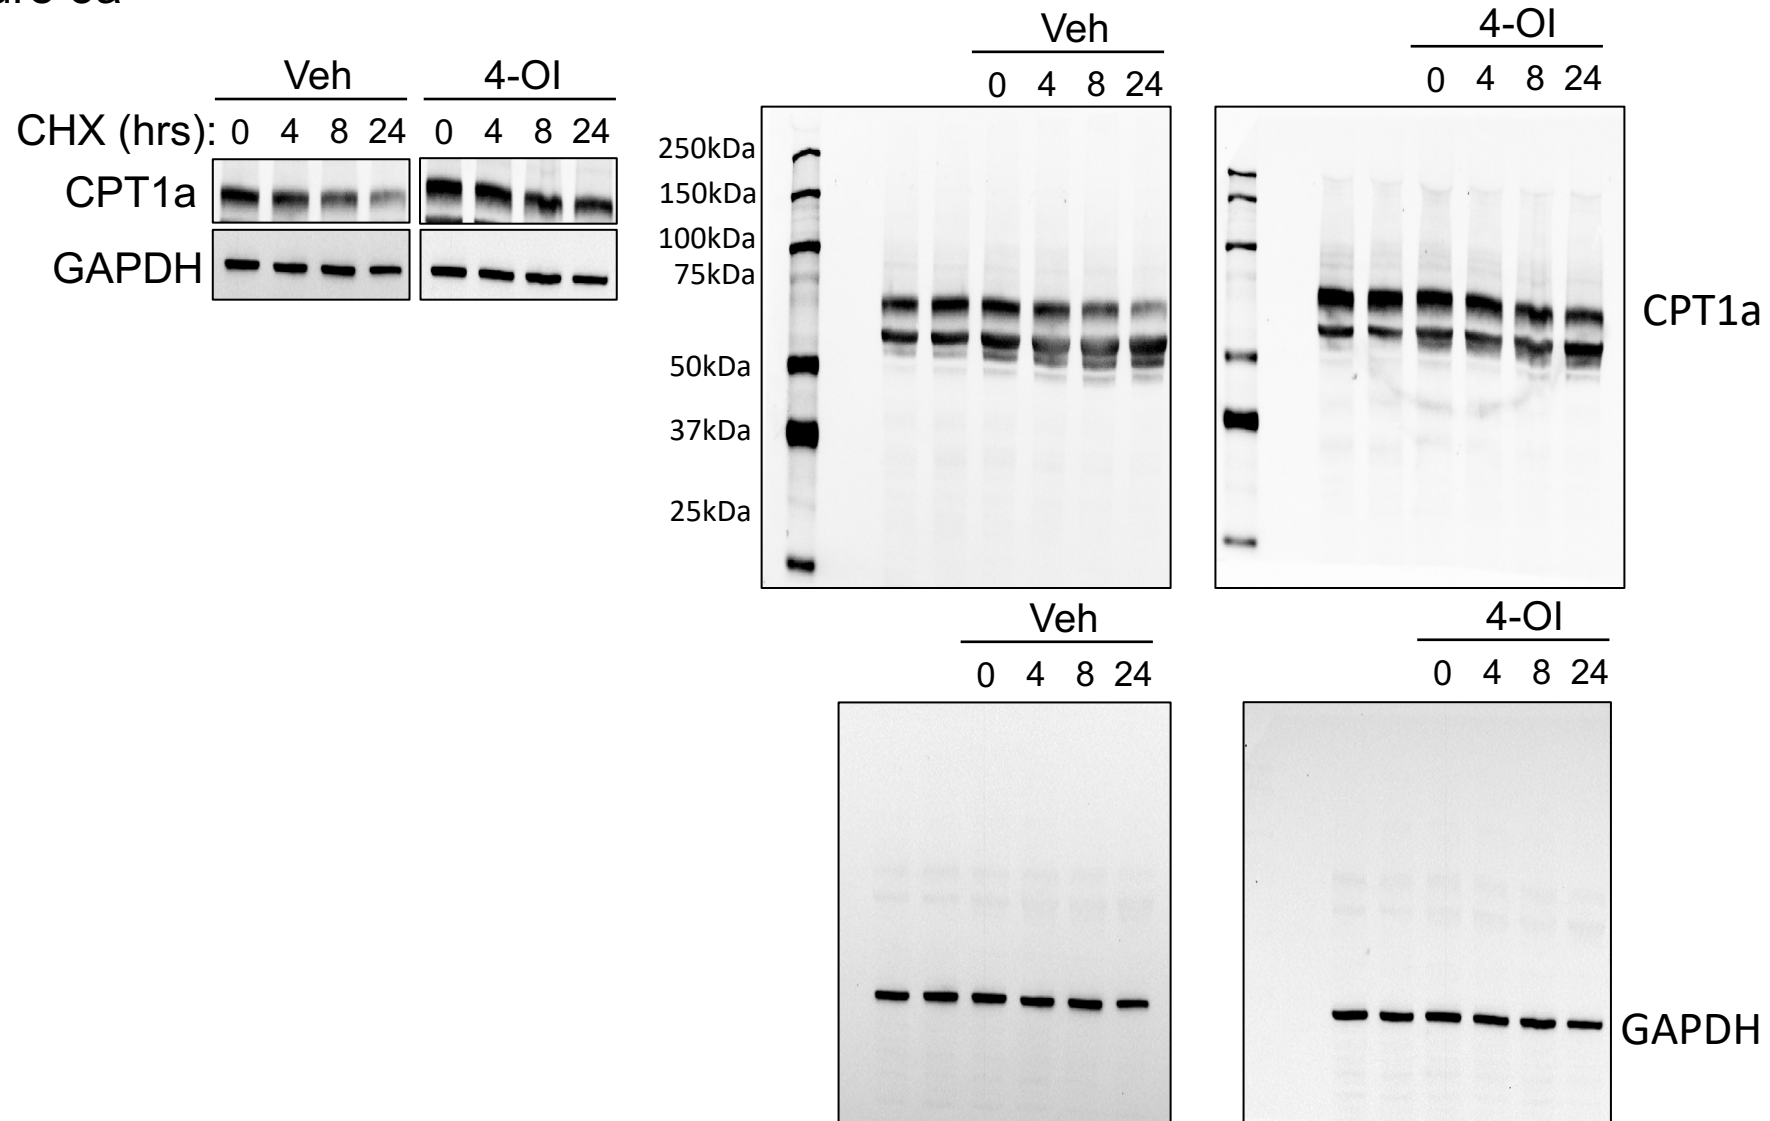

Supplement: fig3-data1 [file elife-92420-fig3-data1-v1.pdf]
